# Supplementary material for: New insights into multi-shape memory behaviours and liquid crystalline properties of supramolecular polyurethane complexes based on pyridine-containing polyurethane and 4-octyldecyloxybenzoic acid
Source: Royal Society of Chemistry journal article supplement (doi:10.1039/c5ta04469c), 2015-01-01
Supplement: c5ta04469c1.pdf [file c5ta04469c1.pdf]

**New insights into multi-shape memory behaviours and liquid crystalline properties of  
supramolecular polyurethane complexes based on pyridine-containing polyurethane and  
4-n-Octyldecyloxybenzoic acid**

Shaojun Chen<sup>1</sup>, Funian Mo<sup>1</sup>, Shiguo Chen<sup>1</sup>, Zaochuan Ge<sup>1</sup>, Haipeng Yang<sup>1</sup>, Jiandong Zuo<sup>1</sup>,  
Xinke Liu<sup>1\*</sup>, Haitao Zhuo<sup>2\*</sup>,

<sup>1</sup>Shenzhen Key Laboratory of Special Functional Materials, Nanshan District Key Lab for  
Biopolymers and Safety Evaluation, College of Materials Science and Engineering, Shenzhen  
University, Shenzhen, 518060, China. <sup>2</sup> College of Chemistry and Chemical Engineering,  
Shenzhen University, Shenzhen, 518060, China.

Corresponding authors: College of Materials Science and Engineering, Shenzhen University,  
Shenzhen, 518060, China. E-mail: X.K. Liu [xkliu@szu.edu.cn](mailto:xkliu@szu.edu.cn); H.T.Zhuo,  
[haitaozhuo@163.com](mailto:haitaozhuo@163.com)

**Supporting Informations**

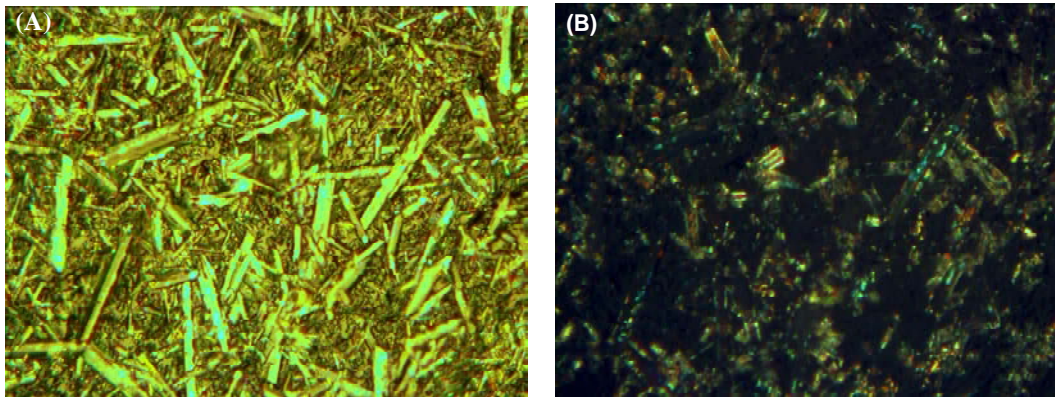

Figure S1. Typical image (A-bright image; B- POM image) of sample PySMPU-0.6OOBA

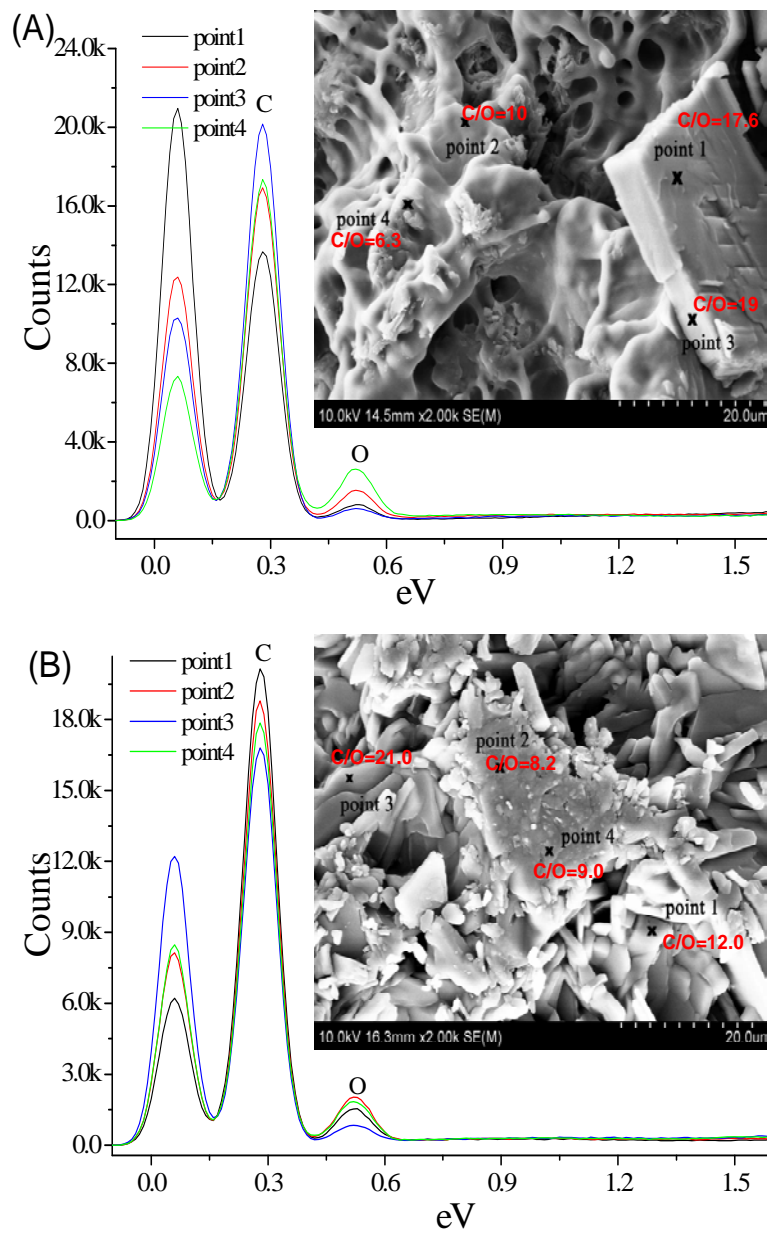

Figure S2. SEM/EDS elemental spectrum of (A) PySMPU-0.2OOBA and (B) PySMPU-1.0OOBA
